# Supplementary material for: O-linked α2,3 sialylation defines stem cell populations in breast cancer
Source: PubMed Central journal article supplement — Sci Adv. 2022 Jan 7;8(1):eabj9513. doi: 10.1126/sciadv.abj9513 (PMC8741191; doi:10.1126/sciadv.abj9513), 2022-01-07
Supplement: sciadv.abj9513_sm.pdf [file sciadv.abj9513_sm.pdf]

Supplementary Materials for

**O-linked  $\alpha$ 2,3 sialylation defines stem cell populations in breast cancer**

Melanie R. Walker, Hira Lal Goel, Dimpri Mukhopadhyay, Peter Chhoy, Emmet R. Karner,  
Jennifer L. Clark, Haibo Liu, Rui Li, Julie Lihua Zhu, Shuhui Chen, Lara K. Mahal,  
Barbara A. Bensing, Arthur M. Mercurio\*

\*Corresponding author. Email: [arthur.mercurio@umassmed.edu](mailto:arthur.mercurio@umassmed.edu)

Published 7 January 2022, *Sci. Adv.* **8**, eabj9513 (2022)  
DOI: [10.1126/sciadv.abj9513](https://doi.org/10.1126/sciadv.abj9513)

**This PDF file includes:**

Figs. S1 to S5  
Tables S1 to S3

Figure S1

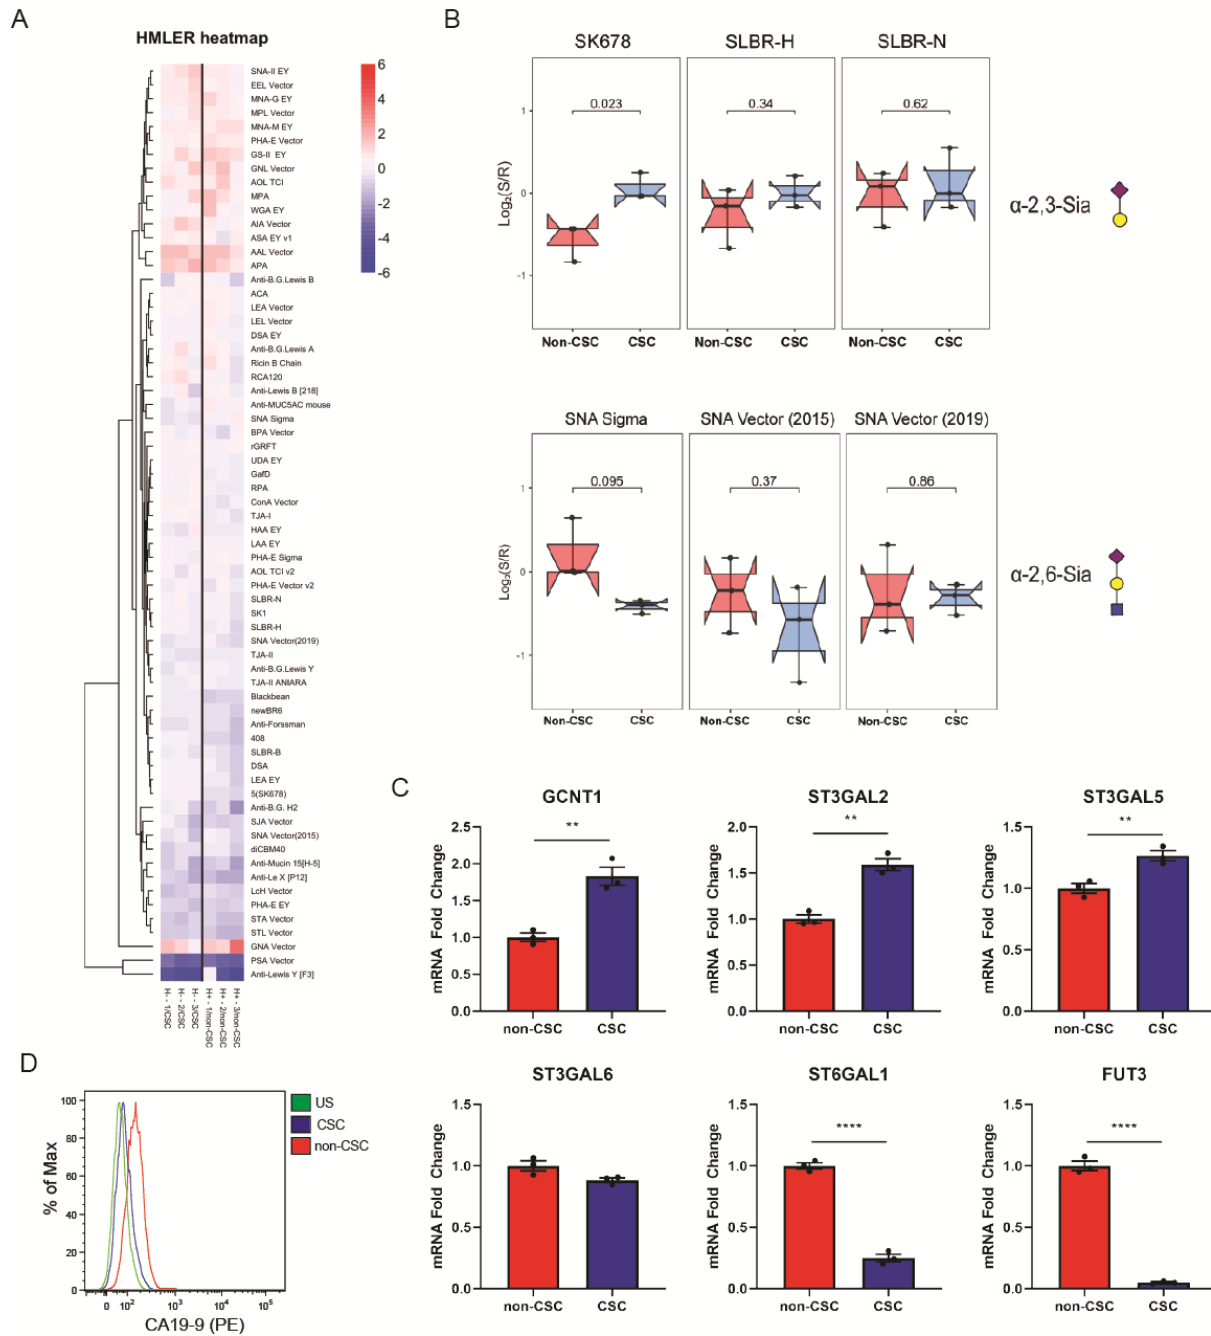

**Figure S1: A)** Heatmap of lectin clustering of CSC and non-CSC populations by dual color lectin microarray technology (n=3). Red,  $\log_2(S/R) > \log_2(S_{\text{median}}/R_{\text{median}})$ ; blue,  $\log_2(S_{\text{median}}/R_{\text{median}}) > \log_2(S/R)$ . Experimental information and lectin printlist are detailed in Tables S1 and S2. **B)** Boxplots depicting the binding affinities of the CSC and non-CSC extracts to lectins identifying  $\alpha$ 2,3 sialoglycans and  $\alpha$ 2,6 sialoglycans. Shown are the results of three replicates with standard deviation. **C)** CSC and non-CSC RNA was analyzed by qPCR for

glycosyltransferases of interest (GCNT1, ST3GAL2, ST3GAL5, ST3GAL6, ST6GAL1, and FUT3). Shown are the means  $\pm$  SEM of a representative experiment of three independent replicates. **D)** HMLER CSC and non-CSC cells were subject to flow cytometric analysis and sLea surface expression was assessed by staining with a CA19-9 antibody. Shown is one replicate of two independent experiments.

Figure S2

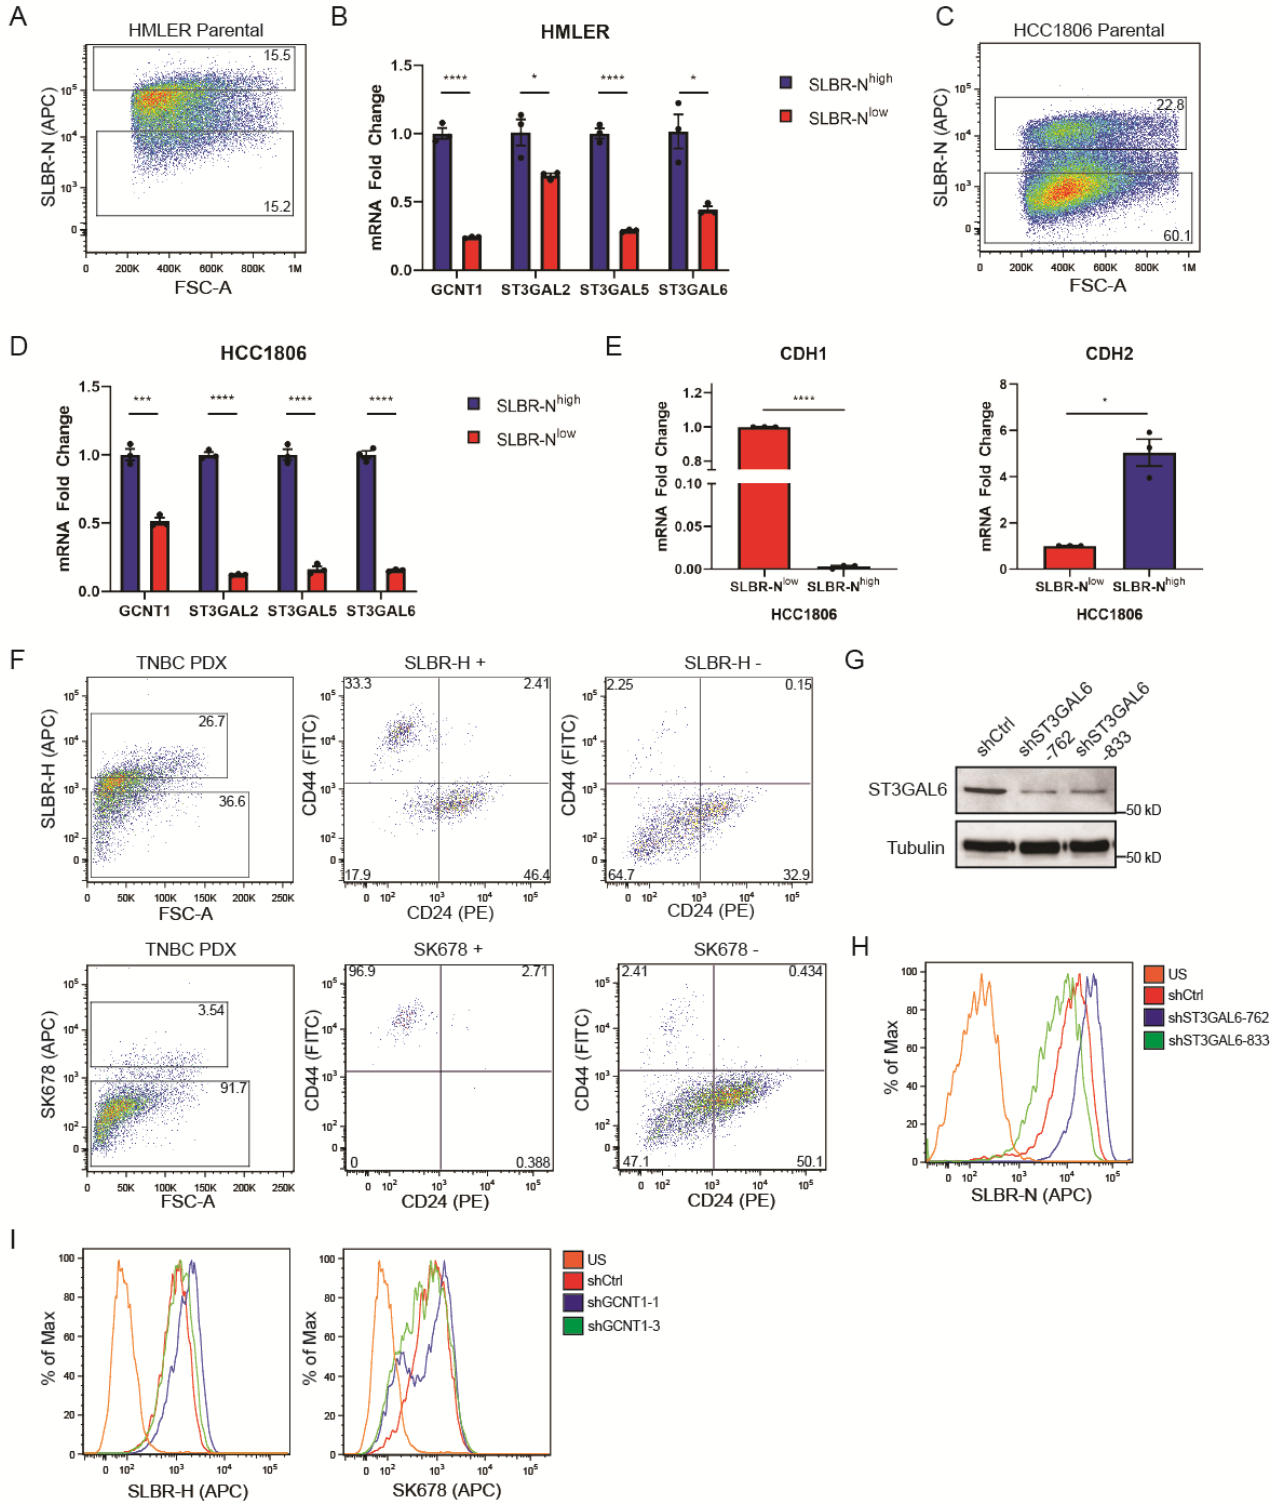

**Figure S2:** **A)** HMLER cells were analyzed and sorted into SLBR-N<sup>high</sup> and SLBR-N<sup>low</sup> cell populations. Shown is one representative plot of FACS analysis and sorting. **B)** HMLER SLBR-N<sup>high</sup> and SLBR-N<sup>low</sup> RNA was analyzed by qPCR for GCNT1, ST3GAL2, ST3GAL5, and ST3GAL6. Shown are the means  $\pm$  SEM of a representative experiment of three independent replicates. **C)** HCC1806 cells were analyzed and sorted into SLBR-N<sup>high</sup> and SLBR-N<sup>low</sup> cell populations. Shown is one representative plot of FACS analysis and sorting. **D)** HCC1806 SLBR-N<sup>high</sup> and SLBR-N<sup>low</sup> RNA was analyzed by qPCR for GCNT1, ST3GAL2, ST3GAL5, and ST3GAL6. Shown are the means  $\pm$  SEM of a representative experiment of three independent replicates. **E)** HCC1806 SLBR-N<sup>high</sup> and SLBR-N<sup>low</sup> RNA was analyzed by qPCR for CDH1 and CDH2. Shown are the means  $\pm$  SEM of three independent replicates. **F)** PDX cells isolated from a TNBC tumor were analyzed for SLBR-H and SK678 binding by flow cytometry. The lectin+ and lectin- populations were then assessed for expression of CD44 and CD24. Shown is one biological replicate. **G)** TE3 cells were stably transfected with control shRNA (shCtrl) or two shRNA clones for ST3GAL6 (shST3GAL6-762 and shST3GAL6-833). Protein lysate was isolated and ST3GAL6 expression was quantified by western blotting. Shown is one replicate of three independent experiments. **H)** TE3 shCtrl and shST3GAL6 cells were assessed for SLBR-N binding by flow cytometric analysis. Shown is one replicate of three independent experiments. **I)** TE3 shCtrl and shGCNT1 cells were assessed for SLBR-H and SK678 binding by flow cytometric analysis. Shown is one replicate of three independent experiments.

Figure S3

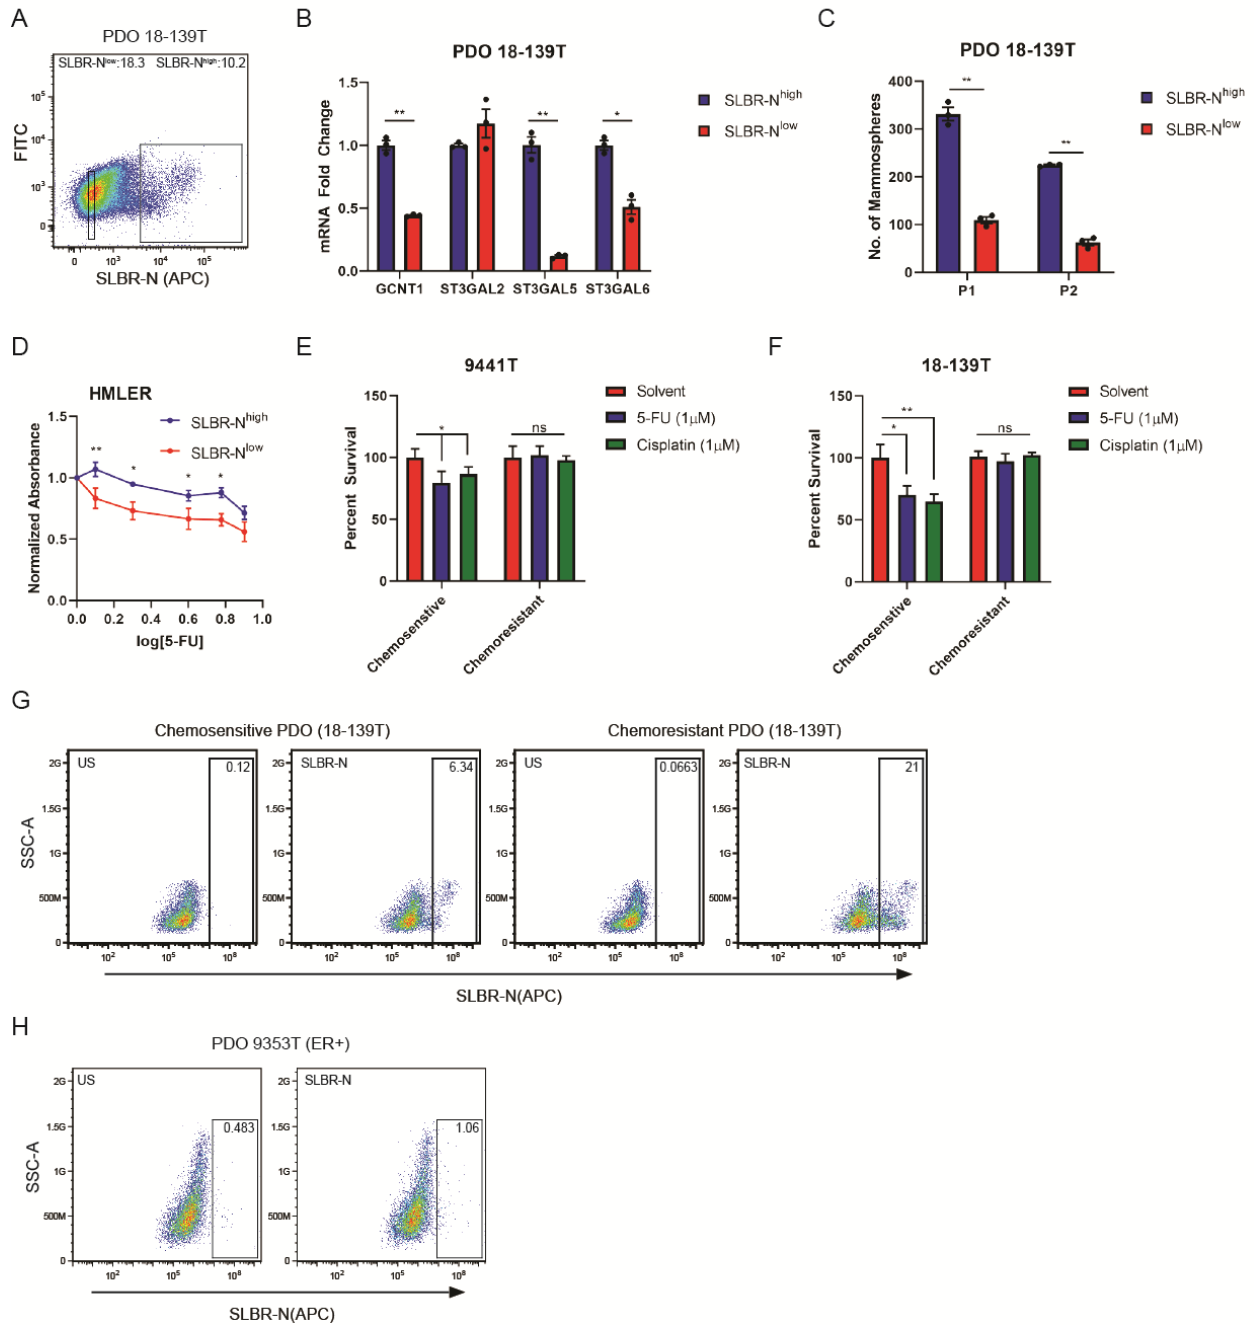

**Figure S3:** **A)** TNBC PDO 18-139T was analyzed and sorted into SLBR-N<sup>high</sup> and SLBR-N<sup>low</sup> cell populations. Shown is one representative plot of FACS analysis and sorting. **B)** TNBC PDO 18-139T SLBR-N<sup>high</sup> and SLBR-N<sup>low</sup> RNA was analyzed by qPCR for GCNT1, ST3GAL2, ST3GAL5, and ST3GAL6. Shown are the means  $\pm$  SEM of three technical replicates. **C)** TNBC PDO 18-139T SLBR-N<sup>high</sup> and SLBR-N<sup>low</sup> cell populations were assayed for self-renewal by serial passage mammosphere formation. Shown are the means  $\pm$  SEM of three technical replicates. **D)** HMLER SLBR-N<sup>high</sup> and SLBR-N<sup>low</sup> cells were treated with 0, 2.5, 5, 10, 25 and 50  $\mu$ M of 5-FU

for 96 hours and percent surviving cells was quantified. Absorbance was normalized to DMSO control. Shown are the means  $\pm$  SEM of three independent experiments. **E)** Survival data for the chemosensitive and chemoresistant PDOs (9441T) after treatment with 5-FU (1 $\mu$ M) and cisplatin (1 $\mu$ M). Shown are the means  $\pm$  SEM of three technical replicates. **G)** Chemosensitive and chemoresistant patient derived organoids (PDO) from TNBC patient tumor (18-139T) were dissociated and incubated with SLBR-N for flow cytometric analysis. Shown is one biological replicate. **H)** Survival data for the chemosensitive and chemoresistant PDOs (18-139T) after treatment with 5-FU (1 $\mu$ M) and cisplatin (1 $\mu$ M). Shown are the means  $\pm$  SEM of three technical replicates. **I)** Chemosensitive and chemoresistant PDOs from ER+ patient tumor (9353T) were dissociated and incubated with SLBR-N for flow cytometric analysis. Shown is one biological replicate.

Figure S4

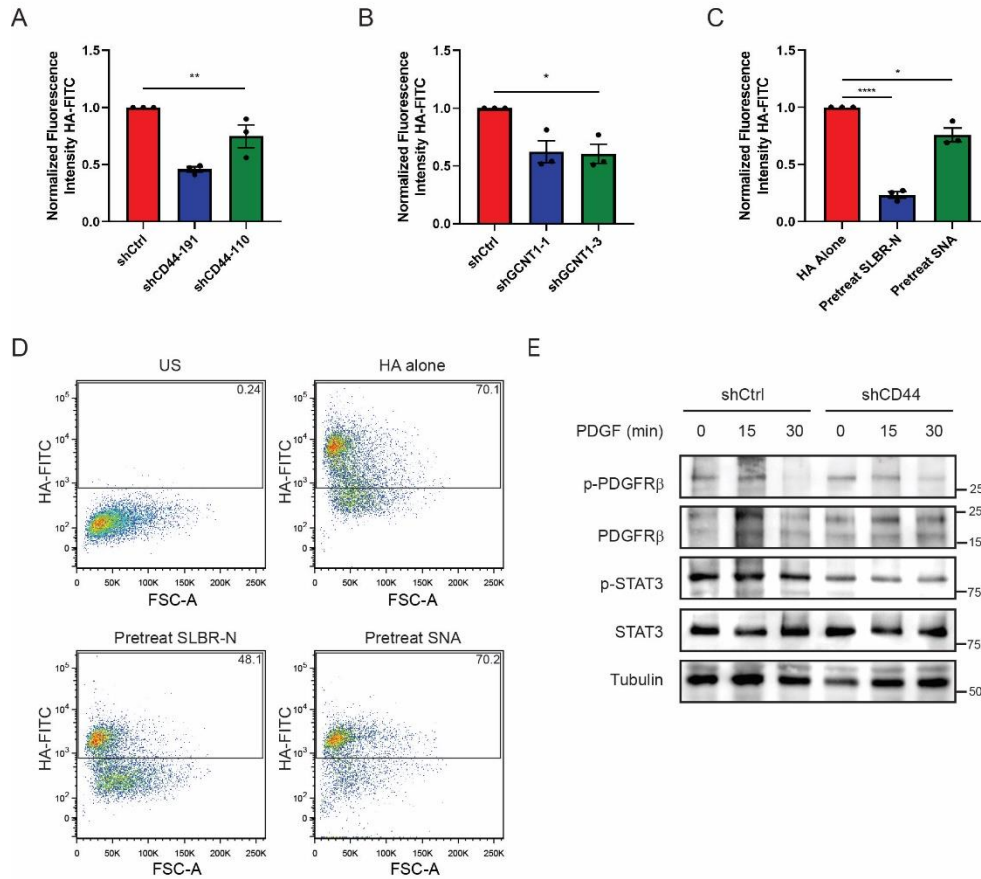

**Figure S4:** Quantification of HA binding experiments: A) shCD44, B) shGCNT1, C) pretreat SLBR-N, and pretreat SNA. Median fluorescence intensity was normalized to the control. Shown are the means  $\pm$  SEM of three independent experiments. D) TE3 cells were serum starved for 12 hours and the affinity of the cells for HA was quantified through flow cytometric analysis with HA conjugated to FITC after no pretreatment or pretreating with SLBR-N or SNA. Shown is one replicate of three independent experiments. E) TE3-shCtrl and TE3-CD44 cells were treated with or without 10ng/mL PDGF for 0, 15, or 30 minutes. Isolated protein was assessed by immunoblotting for phospho-PDGFR $\beta$  (Tyr1009), total PDGFR $\beta$ , phospho-STAT3 (Tyr705), STAT3, and Tubulin. Shown is one replicate of three independent experiments.



Figure S5

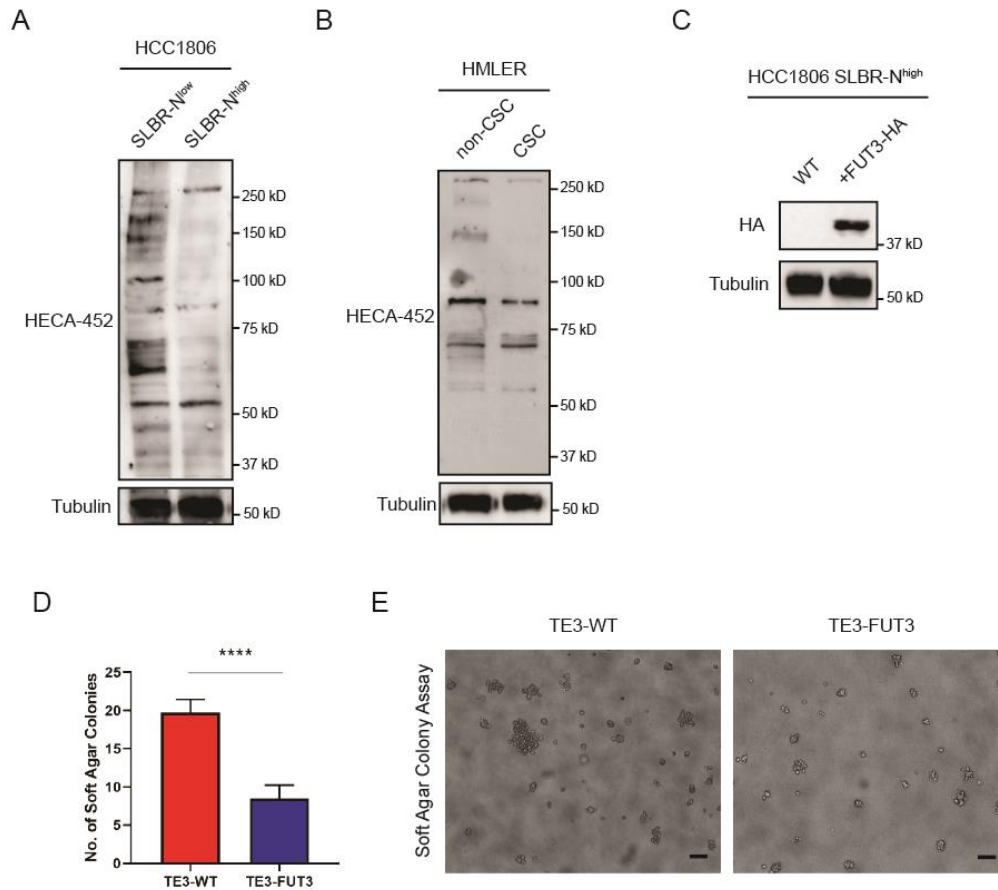

**Figure S5:** **A)** HMLER CSC and non-CSC whole cell lysates were assessed for N-linked sLeX expressing glycoproteins by immunoblotting for HECA-452 and Tubulin. Shown is one replicate of three independent experiments. **B)** HCC1806 SLBR-N<sup>high</sup> and SLBR-N<sup>low</sup> whole cell lysates were assessed for N-linked sLeX expressing glycoproteins by immunoblotting for HECA-452 and Tubulin. Shown is one replicate of three independent experiments. **C)** HCC1806 SLBR-N<sup>high</sup> and SLBR-N<sup>high</sup>+FUT3-HA whole cell lysates were assessed for FUT3 overexpression by immunoblotting for HA and Tubulin. Shown is one replicate of two independent experiments. **D)** Quantitation of soft agar colony formation assay from TE3-WT and TE3-FUT3 cells. Shown is one replicate of three independent experiments. **E)** Representative images of soft agar colony formation assay from TE3-WT and TE3-FUT3 cells. Scale bar = 200µm.

**Table S1. Lectin Microarray Information**

|                                                                                          | Description                                                                                                                                                                                                                                                                                                                                                                                                                                                                                                                                                                                                                                                                                                                                                                                               |
|------------------------------------------------------------------------------------------|-----------------------------------------------------------------------------------------------------------------------------------------------------------------------------------------------------------------------------------------------------------------------------------------------------------------------------------------------------------------------------------------------------------------------------------------------------------------------------------------------------------------------------------------------------------------------------------------------------------------------------------------------------------------------------------------------------------------------------------------------------------------------------------------------------------|
| <b>1. Sample: Glycan-containing sample (e.g. glycan, glycoprotein, cell lysate etc.)</b> |                                                                                                                                                                                                                                                                                                                                                                                                                                                                                                                                                                                                                                                                                                                                                                                                           |
| Description of Sample                                                                    | Glycoproteins on the cell membrane extracted from non-cancer stem cells and cancer-stem cells                                                                                                                                                                                                                                                                                                                                                                                                                                                                                                                                                                                                                                                                                                             |
| Sample preparation protocol                                                              | Spin cells at $500 \times g$ for 5 mins at $4^{\circ}\text{C}$ to remove media. If it is a frozen pellet, suspend in $1 \times \text{PBS}$ (pH 7.4) and spin down at $500 \times g$ for 5 mins at $4^{\circ}\text{C}$ . Suspend in $1 \times \text{PBS}$ (pH 7.4) with protease inhibitors (1:100 dilution). Sonicate the solution on ice with a Vial-Tweeter at 70% power (5s on, 10s off, total: 1 min). Spin down any large debris at $500 \times g$ for 5 mins at $4^{\circ}\text{C}$ . Transfer supernatant to a 3mL ultra-centrifuge tube. Ultra-centrifuge at $100,000 \times g$ for 1 hour at $4^{\circ}\text{C}$ . Carefully decant the supernatant and resuspend the pellet in 200uL $1 \times \text{PBS}$ (pH 7.4).                                                                            |
| Labeling protocol for sample detection                                                   | Samples are labelled with Alexa Fluor 555-NHS (Thermo Fisher).                                                                                                                                                                                                                                                                                                                                                                                                                                                                                                                                                                                                                                                                                                                                            |
| Two-color reference (if used)                                                            | A pooled reference samples are labelled with Alexa Fluor 647-NHS (Thermo Fisher).                                                                                                                                                                                                                                                                                                                                                                                                                                                                                                                                                                                                                                                                                                                         |
| Assay protocol                                                                           | Lectin microarrays are blocked with blocking buffer for one hour at room temperature. Slides are rinsed twice with PBST (0.005%) and once with PBS, then dry the slide using a slide spinner. Each slide was mounted on a 24-well format hybridization cassette (Arrayit), in which each well contains a subarray. To each well, add equal amounts of samples and universal reference, and dilute with PBS and PBST (0.2%) to reach the final volume (150uL). Incubate the slides on an orbital shaker for two hours at room temperature in the dark. After hybridization, wash the arrays with PBST (0.005%) twice for ten minutes, and twice for five minutes. Once finished, remove the slides from the cassette, and immerse the slides in ultrapure water, and dry the slides using a slide spinner. |
| <b>2. Lectin Library</b>                                                                 |                                                                                                                                                                                                                                                                                                                                                                                                                                                                                                                                                                                                                                                                                                                                                                                                           |
| General description of the lectin library used in the array                              | Lectin microarrays are generated in house.                                                                                                                                                                                                                                                                                                                                                                                                                                                                                                                                                                                                                                                                                                                                                                |

|                                                                               |                                                                                                                                                                                                                                                                                                                                                                                                                                                                                                                                                                                                                                                                                                                        |
|-------------------------------------------------------------------------------|------------------------------------------------------------------------------------------------------------------------------------------------------------------------------------------------------------------------------------------------------------------------------------------------------------------------------------------------------------------------------------------------------------------------------------------------------------------------------------------------------------------------------------------------------------------------------------------------------------------------------------------------------------------------------------------------------------------------|
| List of lectins and glycan binding proteins, source, concentration and buffer | Please see <b>Table S2</b> .                                                                                                                                                                                                                                                                                                                                                                                                                                                                                                                                                                                                                                                                                           |
| Modification of lectins (e.g. biotin) if any.                                 | N/A                                                                                                                                                                                                                                                                                                                                                                                                                                                                                                                                                                                                                                                                                                                    |
| <b>3. Immobilization Surface; e.g., Microarray Slide</b>                      |                                                                                                                                                                                                                                                                                                                                                                                                                                                                                                                                                                                                                                                                                                                        |
| Immobilization surface                                                        | Nexterion Slide H Barcoded 3D Hydrogel Coated                                                                                                                                                                                                                                                                                                                                                                                                                                                                                                                                                                                                                                                                          |
| Manufacturer                                                                  | Schott North America                                                                                                                                                                                                                                                                                                                                                                                                                                                                                                                                                                                                                                                                                                   |
| Custom preparation of surface                                                 | N/A                                                                                                                                                                                                                                                                                                                                                                                                                                                                                                                                                                                                                                                                                                                    |
| <b>4. Array Production</b>                                                    |                                                                                                                                                                                                                                                                                                                                                                                                                                                                                                                                                                                                                                                                                                                        |
| Description of Arrayer                                                        | Nano-Plotter 2.1 piezoelectric printer (GeSim, Germany) with cooled microwell plate holder and cooled printing deck                                                                                                                                                                                                                                                                                                                                                                                                                                                                                                                                                                                                    |
| Lectin deposition                                                             | Three replicates of each lectin are printed onto each subarray.                                                                                                                                                                                                                                                                                                                                                                                                                                                                                                                                                                                                                                                        |
| Printing conditions                                                           | Dilute lectins to the pre-determined concentrations in the print buffer (final concentration of print buffer: 0.01% Tween-20, 1mM monosaccharide in PBS; Please see <b>Table S2</b> for the concentrations of lectins). Load the mixed solution to the microplate. Before printing, check the humidity of the print chamber. The humidity should be kept around 50% during the entire printing. Ensure both microwell plate holder and printing deck are cooled. Adjust the cooling temperature based on ambient temperature and the temperature of the cooled slide deck surface, preventing moisture building up inside the print chamber. Once printing is complete, allow the slides to dry for at least one hour. |
| Array layout                                                                  | For each microarray, it contains 24 subarrays (3 columns and 8 rows). In each subarray, triplicates of a lectin are printed, and for a row with five lectins, the spot layout should be 15 columns. The row number depends on how many lectin probes are printed on the arrays (i.e., 110 lectins require 22 rows).                                                                                                                                                                                                                                                                                                                                                                                                    |
| Quality control                                                               | Well-characterized glycoproteins including fetuin, asialofetuin and RNase B are used for quality assurances of the printed microarrays.                                                                                                                                                                                                                                                                                                                                                                                                                                                                                                                                                                                |
| <b>5. Detector and Data Processing</b>                                        |                                                                                                                                                                                                                                                                                                                                                                                                                                                                                                                                                                                                                                                                                                                        |

|                                               |                                                                                                                                                                                                                                                                                                                                                                                                                                                                          |
|-----------------------------------------------|--------------------------------------------------------------------------------------------------------------------------------------------------------------------------------------------------------------------------------------------------------------------------------------------------------------------------------------------------------------------------------------------------------------------------------------------------------------------------|
| Instrument (scanner, flow cytometer)          | Fluorescent Slide Scanner Genepix 4300A (Molecular Devices)                                                                                                                                                                                                                                                                                                                                                                                                              |
| Instrument settings                           | Preview the slide to adjust photomultiplier gain (PMT) for each channel (Alexa Fluor-555: 532nm, Alexa Fluor-647: 635nm) so that the signals are not saturated and within the linear detection range.                                                                                                                                                                                                                                                                    |
| Image analysis software                       | GenePix Pro 7 (Molecular Devices)                                                                                                                                                                                                                                                                                                                                                                                                                                        |
| Data processing and statistical analysis      | Extracted data is processed for quality checks using Grubbs outlier test with $\alpha = 0.05$ . $\text{Log}_2$ values of the average signals are median-normalized over the individual subarray in each channel.                                                                                                                                                                                                                                                         |
| <b>6. Lectin Microarray Data Presentation</b> |                                                                                                                                                                                                                                                                                                                                                                                                                                                                          |
| Data presentation and interpretation          | Hierarchical clustering of the processed data is performed using Pearson Correlation coefficient, and visualized with Multi-experiment Viewer (MeV, v4.8, TM4 Microarray Software Suite). If a lectin's SNR (signal-to-noise ratio) $< 3$ for more than one third of the total samples, then this lectin is considered as inactive and excluded from the list. <i>P</i> -values are calculated using nonparametric statistical tests, which are generated by R (v3.6.1). |
| <b>7. Data Location</b>                       |                                                                                                                                                                                                                                                                                                                                                                                                                                                                          |
| Data Location                                 | Synapse.org (doi:10.7303/syn26451619)                                                                                                                                                                                                                                                                                                                                                                                                                                    |

**Table S2. Lectins used in microarrays**

| Lectin            | Species/Origin                                      | Print Conc. (µg/mL) | Rough Specificity /Inhibitory monosaccharide | Vendor/Source                 |
|-------------------|-----------------------------------------------------|---------------------|----------------------------------------------|-------------------------------|
| AAL               | <i>Aleuria aurantia</i>                             | 1000                | Fucose                                       | Vector                        |
| ACA               | <i>Amaranthus Caudatus</i>                          | 1000                | Gal-β1,3-GalNAc                              | Vector                        |
| AIA               | <i>Artocarpus integrifolia</i>                      | 500                 | β1,3-GalNAc                                  | Vector/EY                     |
| AMA               | <i>Allium moly</i>                                  | 500                 | Oligo mannose                                | EY                            |
| Anti-B.G.H2       | MAb mouse IgM [A46-B/B10]                           | undiluted           | Blood group H2 antigen                       | Santa Cruz Biotechnology      |
| Anti-Forsman      | MAB Rat IgM [117C9]                                 | undiluted           | Forsman Antigen                              | Abcam                         |
| Anti-Lewis A      | MAB mouse IgG [7LE]                                 | undiluted           | Lewis A                                      | Abcam                         |
| Anti-Lewis B      | IgM [T218]                                          | undiluted           | Lewis B                                      | Sigma                         |
| Anti-Lewis X      | MAB mouse IgM [P12]                                 | undiluted           | Lewis X                                      | Abcam                         |
| Anti-Lewis Y      | MAB mouse IgM [F3]                                  | undiluted           | Lewis Y                                      | Abcam                         |
| Anti-MUC5AC human | Mab mouse IgG1 [CLH2]                               | undiluted           | human MUC5AC                                 | Sigma                         |
| Anti-MUC5AC mouse | Goat polyclonal to mouse MUC5AC                     | undiluted           | mouse MUC5AC                                 | LSBio                         |
| Anti-Mucin 15     | Mab mouse IgG1 [H-5]                                | undiluted           | Mucin 15                                     | Santa Cruz Biotechnology      |
| AOL               | <i>Aspergillus oryzae</i>                           | 1000                | Fucose                                       | TCI America                   |
| APA               | <i>Abrus precatorius</i>                            | 500                 | Gal-β1,3-GalNAc / Lac                        | EY                            |
| ASA               | <i>Allium sativum</i>                               | 1000                | Mannose                                      | EY                            |
| Blackbean         | <i>Blackbean crude</i>                              | 1000                | GalNAc                                       | EY                            |
| BPA               | <i>Bauhinia purpurea</i>                            | 500                 | β-Gal / β-GalNAc                             | Vector                        |
| BR6               | <i>Unknown</i>                                      | 500                 | Unknown                                      | Gift from Dr. Barbara Bensing |
| CA                | <i>Colchicum autumnale</i>                          | 1200                | Bi-antennary N-linked glycans                | EY                            |
| Calsepa           | <i>Calystegia sepium</i>                            | 1000                | Bisecting N-linked glycans                   | EY                            |
| Cholera Toxin     | <i>Vibrio cholerae</i>                              | 1000                | GM1 ganglioside                              | Sigma                         |
| Con A             | <i>Canavalia ensiformis</i>                         | 1000                | Tri-mannose core                             | EY/Vector                     |
| CSA               | <i>Cystisus scoparius</i>                           | 1000                | Terminal GalNAc                              | EY                            |
| DBA               | <i>Dolichos Biflorus</i>                            | 1000                | GalNAc                                       | Vector                        |
| diCBM40           | engineered NanI from <i>Clostridium perfringens</i> | 1000                | α Sialylation                                | Generated in house            |

|         |                                                |      |                                      |                               |
|---------|------------------------------------------------|------|--------------------------------------|-------------------------------|
| DSA     | <i>Datura stramonium</i>                       | 500  | LacNAc                               | EY/Vector                     |
| ECA     | <i>Erythrina cristagalli</i>                   | 1000 | LacNAc                               | Vector                        |
| EEL/EEA | <i>Eunonymus europaeus</i>                     | 1000 | Blood Group B                        | Vector/EY                     |
| GafD    | recombinant GafD from <i>Escherichia coli</i>  | 1000 | GlcNAc                               | Generated in house            |
| GNA/GNL | <i>Galanthus nivalis</i>                       | 1500 | Oligo mannose                        | Vector/EY                     |
| GS-I    | <i>Griffonia simplicifolia-I</i>               | 1000 | $\alpha$ -Gal / Lac                  | Vector/EY                     |
| GS-II   | <i>Griffonia simplicifolia-II</i>              | 1000 | GlcNAc                               | Vector                        |
| GS-IB4  | <i>Griffonia simplicifolia-I, isolectin B4</i> | 2000 | Gal                                  | Vector                        |
| H84T    | <i>Banana lectin</i>                           | 1000 | High mannose                         | Gift from Dr. David Markovitz |
| HAA     | <i>Homarus americanus</i>                      | 1000 | Terminal GalNAc                      | EY                            |
| HHL     | <i>Hippeastrum Hybrid</i>                      | 1500 | Oligo/High mannose                   | Vector                        |
| HPA     | <i>Helix pomatia</i>                           | 1000 | Blood Group A                        | Sigma/EY                      |
| LAA     | <i>Laburnum alpinum</i>                        | 900  | GlcNAc                               | EY                            |
| LcH     | <i>Lens Culinaris</i>                          | 1000 | Core Fucose                          | Vector                        |
| LEA/LEL | <i>Lycopersicon esculentum</i>                 | 1000 | GlcNAc                               | Vector/EY                     |
| Lotus   | <i>Lotus tetragonolobus</i>                    | 1000 | Fucose                               | Vector                        |
| MAL-I   | <i>Maackia amurensis-I</i>                     | 2000 | Sialylation/Sulfation                | Vector                        |
| MAL-II  | <i>Maackia amurensis-II</i>                    | 2000 | Sialylation/Sulfation                | Vector                        |
| MNA-G   | <i>Morus nigra Morniga G</i>                   | 1000 | GalNAc                               | EY                            |
| MNA-M   | <i>Morus nigra Morniga M</i>                   | 1000 | Oligo mannose / Gal                  | EY                            |
| MPA/MPL | <i>Maclura pomifera</i>                        | 1000 | $\beta$ 1,3-GalNAc                   | Vector                        |
| NPA     | <i>Narcissus pseudonarcissus</i>               | 1000 | Oligo mannose                        | Vector                        |
| PA-I    | <i>Pseudomonas aeruginosa</i>                  | 1000 | Gal                                  | Sigma                         |
| PHA-E   | <i>Phaseolus vulgaris Erythroagglutinin</i>    | 1000 | Bisecting GlcNAc                     | Vector/EY/Sigma               |
| PHA-L   | <i>Phaseolus vulgaris Leukoagglutinin</i>      | 1000 | $\beta$ 1,6 Branching N-Link glycans | Vector/EY/Roche               |
| PNA     | <i>Arachis hyogaea</i>                         | 1000 | Gal- $\beta$ 1,3-GalNAc              | Vector/EY                     |
| PSA     | <i>Pisum sativum</i>                           | 1000 | Core Fucose                          | Vector                        |
| PTA     | <i>Psophocarpus tetragonolobus</i>             | 500  | Blood Groups                         | EY                            |

|               |                                       |          |                                  |                                          |
|---------------|---------------------------------------|----------|----------------------------------|------------------------------------------|
| PTL-I         | <i>Psophocarpus tetragonolobus-I</i>  | 1500     | Blood Group A                    | Vector                                   |
| PTL-II        | <i>Psophocarpus tetragonolobus-II</i> | 1000     | $\alpha$ 2 Fucose                | Vector                                   |
| RCA120        | <i>Ricinus Communis Agglutinin I</i>  | 1000     | Gal / Lac                        | Vector                                   |
| rGRFT         | <i>recombinant Griffithsin</i>        | 1000     | High mannose                     | Gift from Dr. Barry O'Keefe              |
| Ricin B Chain | <i>Ricinus communis</i>               | 1000     | Gal                              | Vector                                   |
| RPA           | <i>Robinia pseudoacacia</i>           | 500      | Complex N-link glycans           | EY                                       |
| rSVN          | <i>recombinant Scytovirin</i>         | 1000     | High mannose                     | Gift from Dr. Barry O'Keefe              |
| SBA           | <i>Glycine max</i>                    | 1000     | LacdiNAc                         | Vector                                   |
| SJA           | <i>Sophora japonica</i>               | 1000     | LacdiNAc                         | Vector                                   |
| SK1           | <i>Streptococcus sanguinis SK1</i>    | 1800     | $\alpha$ 2,3 sialylation         | Gift from Dr. Barbara Bensing            |
| SK678         | <i>Streptococcus sanguinis SK678</i>  | 450      | $\alpha$ 2,3 sialylation         | Gift from Dr. Barbara Bensing            |
| SLBR-B        | <i>Streptococcus gordonii M99</i>     | 1000     | $\alpha$ 2,3 sialylation         | Gift from Dr. Barbara Bensing            |
| SLBR-H        | <i>Streptococcus gordonii DLI</i>     | 2000     | $\alpha$ 2,3 sialylation         | Gift from Dr. Barbara Bensing            |
| SLBR-N        | <i>Streptococcus gordonii UB10712</i> | 1000     | $\alpha$ 2,3 sialylation         | Gift from Dr. Barbara Bensing            |
| SNA           | <i>Sambucus nigra</i>                 | 500/1000 | $\alpha$ 2,6 sialylation         | Vector/Sigma                             |
| SNA-II        | <i>Sambucus nigra-II</i>              | 1000     | $\alpha$ 2 Fucose /oligo mannose | EY                                       |
| STA/STL       | <i>Solanus tuberosum</i>              | 500      | GlcNAc                           | Vector                                   |
| TJA-I         | <i>Trichosanthes japonica-I</i>       | 1000     | $\alpha$ 2,6 sialylation         | TCI                                      |
| TJA-II        | <i>Trichosanthes japonica-II</i>      | 1000     | $\alpha$ 2 Fucose                | NorthStar Bioproducts/Aniara Diagnostica |
| TL            | <i>Tulipa sp.</i>                     | 700      | GlcNAc                           | EY                                       |
| UDA           | <i>Urtica dioica</i>                  | 1000     | GlcNAc / Oligo mannose           | EY                                       |
| UEA-I         | <i>Ulex europaeus-I</i>               | 1000     | $\alpha$ 2 Fucose                | Vector                                   |
| UEA-II        | <i>Ulex europaeus-II</i>              | 2000     | GlcNAc                           | Vector                                   |
| VFA           | <i>Vicia faba</i>                     | 1000     | GlcNAc                           | EY                                       |
| VVA           | <i>Vicia villosa</i>                  | 1000     | Terminal GalNAc                  | Vector/EY                                |
| VVA (man)     | <i>Vicia villosa</i>                  | 500      | Mannose                          | Vector/EY                                |
| WFA           | <i>Wisteria floribunda</i>            | 1000     | GalNAc- $\beta$ 1,4              | Vector                                   |
| WGA           | <i>Triticum vulgare</i>               | 1000     | GlcNAc                           | Vector/EY                                |

**Table S3. Mass spectrometry results of SLBR-N enriched glycoproteins expressed in the HMLER CSC population.**

| <b>Accession Number</b> | <b>Description</b>                                                           | <b>ID</b> | <b>Total #PSM in HMLER CSCs</b> | <b>M.W.</b> |
|-------------------------|------------------------------------------------------------------------------|-----------|---------------------------------|-------------|
| <b>O00425</b>           | IF2B3_HUMAN Insulin-like growth factor 2 mRNA-binding protein 3              | IGF2BP3   | 24                              | 64 kDa      |
| <b>O60716-10</b>        | CTND1_HUMAN Isoform 2AB of Catenin delta-1                                   | CTNND1    | 17                              | 101 kDa     |
| <b>P01130-3</b>         | LDLR_HUMAN Isoform 3 of Low-density lipoprotein receptor                     | LDLR      | 26                              | 77 kDa      |
| <b>P02786</b>           | TFR1_HUMAN Transferrin receptor protein 1                                    | TFRC      | 4                               | 85 kDa      |
| <b>P05556-2</b>         | ITB1_HUMAN Isoform 2 of Integrin beta-1                                      | ITGB1     | 4                               | 87 kDa      |
| <b>P08648</b>           | ITA5_HUMAN Integrin alpha-5                                                  | ITGA5     | 7                               | 115 kDa     |
| <b>P16070-10</b>        | CD44_HUMAN Isoform 10 of CD44 antigen                                        | CD44      | 32                              | 53 kDa      |
| <b>P16144-2</b>         | ITB4_HUMAN Isoform Beta-4A of Integrin beta-4                                | ITGB4     | 2                               | 195 kDa     |
| <b>P23470-2</b>         | PTPRG_HUMAN Isoform 2 of Receptor-type tyrosine-protein phosphatase gamma    | PTPRG     | 19                              | 159 kDa     |
| <b>P29317</b>           | EPHA2_HUMAN Ephrin type-A receptor 2                                         | EPHA2     | 11                              | 108 kDa     |
| <b>P35221-2</b>         | CTNA1_HUMAN Isoform 2 of Catenin alpha-1                                     | CTNNA1    | 6                               | 103 kDa     |
| <b>P49327</b>           | FAS_HUMAN Fatty acid synthase                                                | FASN      | 86                              | 273 kDa     |
| <b>P63244</b>           | RACK1_HUMAN Receptor of activated protein C kinase 1                         | RACK1     | 16                              | 35 kDa      |
| <b>Q08431</b>           | MFGM_HUMAN Lactadherin                                                       | MFGE8     | 12                              | 43 kDa      |
| <b>Q13751</b>           | LAMB3_HUMAN Laminin subunit beta-3                                           | LAMB3     | 7                               | 130 kDa     |
| <b>Q6NZI2</b>           | CAVN1_HUMAN Caveolae-associated protein 1                                    | CAVIN1    | 11                              | 43 kDa      |
| <b>Q6YHK3-2</b>         | CD109_HUMAN Isoform 2 of CD109 antigen                                       | CD109     | 4                               | 153 kDa     |
| <b>Q9NZI8</b>           | IF2B1_HUMAN Insulin-like growth factor 2 mRNA-binding protein 1              | IGF2BP1   | 13                              | 63 kDa      |
| <b>Q9Y6M1-1</b>         | IF2B2_HUMAN Isoform 2 of Insulin-like growth factor 2 mRNA-binding protein 2 | IGF2BP2   | 30                              | 62 kDa      |
